# Supplementary material
Source: publisher figshare collection journal article supplement (https://tandf.figshare.com/ndownloader/files/25808110)
Supplement: Supplementary file 1 [file 25808110]

## Sheet: Supplemental Table 1
Species	Arctic	Alpine and sub-alpine	Sub-antarctic	Number of regions
	Wasowicz et al. (2019)	McDougall et al. (2011) Alexander et al. (2016)	Frenot et al. (2005)
Achillea-millefolium	1	1	1	3
Agrostis-capillaris	1	1	1	3
Agrostis-gigantea	1	1	1	3
Agrostis-stolonifera	1	1	1	3
Alopecurus-geniculatus	1	1	1	3
Alopecurus-pratensis	1	1	1	3
Bromus-hordeaceus	1	1	1	3
Capsella-bursa-pastoris	1	1	1	3
Cerastium-fontanum-	1	1	1	3
Dactylis-glomerata	1	1	1	3
Deschampsia-caespitosa-	1	1	1	3
Festuca-ovina	1	1	1	3
Festuca-rubra	1	1	1	3
Lolium-perenne	1	1	1	3
Medicago-sativa	1	1	1	3
Melilotus-officinalis	1	1	1	3
Phleum-pratense	1	1	1	3
Plantago-lanceolata	1	1	1	3
Poa-annua	1	1	1	3
Poa-pratensis	1	1	1	3
Rumex-acetosella	1	1	1	3
Rumex-crispus	1	1	1	3
Sagina-procumbens	1	1	1	3
Senecio-vulgaris	1	1	1	3
Sinapis-arvensis	1	1	1	3
Stellaria-media	1	1	1	3
Trifolium-repens	1	1	1	3
Veronica-serpyllifolia	1	1	1	3
Two-of-three-regions	-	-	-	-
Achillea-ptarmica-	1	-	1	2
Agrostis-canina-	1	-	1	2
Alchemilla-monticola-	1	-	1	2
Amaranthus-retroflexus	1	1	-	2
Anthoxanthum-odoratum	-	1	1	2
Anthriscus-sylvestris-	1	-	1	2
Avena-fatua	1	1	-	2
Bellis-perennis-	1	-	1	2
Bidens-tripartita	1	1	-	2
Brassica-napus	1	-	1	2
Brassica-oleracea-	1	-	1	2
Bromus-inermis	1	1	-	2
Cannabis-sativa	1	1	-	2
Cerastium-glomeratum	-	1	1	2
Chenopodium-album	1	1	-	2
Cirsium-arvense	1	-	1	2
Convolvulus-arvensis	1	1	-	2
Datura-stramonium	1	1	-	2
Descurainia-sophia	1	1	-	2
Elymus-repens-	1	-	1	2
Erodium-cicutarium	1	1	-	2
Fallopia-convolvulus	1	1	-	2
Festuca-arundinacea	-	1	1	2
Galium-aparine-	1	-	1	2
Galium-mollugo-	1	-	1	2
Holcus-lanatus	-	1	1	2
Hordeum-distichon-	1	-	1	2
Hordeum-jubatum	1	1	-	2
Hypochaeris-radicata	-	1	1	2
Juncus-bufonius-	1	-	1	2
Lappula-squarrosa	1	1	-	2
Lapsana-communis	1	1	-	2
Lepidium-campestre-	1	-	1	2
Leucanthemum-vulgare-	1	-	1	2
Lolium-multiflorum-	1	-	1	2
Lupinus-nootkatensis	1	1	-	2
Lupinus-polyphyllus-	1	1	-	2
Medicago-lupulina	1	1	-	2
Melilotus-albus	1	1	-	2
Myosotis-discolor	-	1	1	2
Myosotis-scorpioides	1	1	-	2
Oxalis-corniculata	-	1	1	2
Poa-compressa	1	1	-	2
Poa-trivialis	1	-	1	2
Polygonum-aviculare	1	1	-	2
Prunella-vulgaris	1	1	-	2
Ranunculus-acris-	1	-	1	2
Ranunculus-repens-	1	-	1	2
Raphanum-raphanistrum-	1	-	1	2
Rheum-rhabarbarum	1	1	-	2
Rumex-acetosa	1	1	-	2
Salix-alaxensis	1	1	-	2
Sherardia-arvensis	-	1	1	2
Sinapis-alba	1	1	-	2
Sisymbrium-altissimum	1	1	-	2
Sonchus-asper	1	1	-	2
Sonchus-oleraceus	1	1	-	2
Spergularia-rubra	1	1	-	2
Tanacetum-vulgare	1	-	1	2
Taraxacum-officinale	-	1	1	2
Trifolium-arvense	1	1	-	2
Trifolium-hybridum	1	1	-	2
Tripleurospermum-maritimum	1	1	-	2
Triticum-aestivum	1	1	-	2
Urtica-dioica	1	1	-	2
Urtica-urens	1	1	-	2
Vicia-sativa	1	1	-	2
Viola-arvensis	1	1	-	2
Vulpia-bromoides	-	1	1	2
Xanthium-strumarium	1	1	-	2

## Sheet: Sheet2
Species	Alpine and Arctic	Arctic	Alpine and sub-alpine	Sub-antarctic	Total
	Alexander et al. (2016) Wasowicz et al. (2019)	Wasowicz et al. (2019)	McDougall et al. (2011)	Frenot et al. (2005)
Achillea millefolium	1	1	1	1	3
Agrostis capillaris		1	1	1	3
Agrostis gigantea		1	1	1	3
Agrostis stolonifera		1	1	1	3
Alopecurus geniculatus		1	1	1	3
Alopecurus pratensis		1	1	1	3
Bromus hordeaceus		1	1	1	3
Capsella bursa-pastoris	1	1	1	1	3
Cerastium fontanum Baumg. p Caryophyllaceae xx xx x xx xx x	1	1	1	1	3
Dactylis glomerata	1	1	1	1	3
Deschampsia caespitosa (L.) P. Beauv. p Poaceae xx		1	1	1	3
Festuca ovina		1	1	1	3
Festuca rubra	1	1	1	1	3
Lolium perenne	1	1	1	1	3
Medicago sativa		1	1	1	3
Melilotus officinalis		1	1	1	3
Phleum pratense	1	1	1	1	3
Plantago lanceolata	1	1	1	1	3
Poa annua	1	1	1	1	3
Poa pratensis	1	1	1	1	3
Rumex acetosella	1	1	1	1	3
Rumex crispus	1	1	1	1	3
Sagina procumbens		1	1	1	3
Senecio vulgaris		1	1	1	3
Sinapis arvensis		1	1	1	3
Stellaria media	1	1	1	1	3
Trifolium repens	1	1	1	1	3
Veronica serpyllifolia		1	1	1	3
Achillea ptarmica L. ? ? × × ? ? ? ? Asteraceae		1		1	2
Agrostis canina L. ? ? Poaceae		1		1	2
Alchemilla monticola Opiz ? Rosaceae		1		1	2
Amaranthus retroflexus		1	1		2
Anthoxanthum odoratum			1	1	2
Anthriscus sylvestris (L.) Hoffm. p Apiaceae x		1		1	2
Avena fatua		1	1		2
Bellis perennis L. ? Asteraceae		1		1	2
Bidens tripartita		1	1		2
Brassica napus L. b Brassicaceae x x (1)		1		1	2
Brassica oleracea (L.) Koch b Brassicaceae x		1		1	2
Bromus inermis		1	1		2
Cannabis sativa		1	1		2
Cerastium glomeratum			1	1	2
Chenopodium album		1	1		2
Cirsium arvense (L.) Scop. p Asteraceae x x (3)		1		1	2
Convolvulus arvensis		1	1		2
Datura stramonium		1	1		2
Descurainia sophia		1	1		2
Elymus repens (L.) Gould ? ? ? ? × × ? × ? ? ? ? Poaceae		1		1	2
Erodium cicutarium	not sub	1	1		2
Fallopia convolvulus		1	1		2
Festuca arundinacea			1	1	2
Galium aparine L. ? ? ? ? ? Rubiaceae		1		1	2
Galium mollugo L. p Rubiaceae x		1		1	2
Holcus lanatus			1	1	2
Hordeum distichon L. ? Poaceae		1		1	2
Hordeum jubatum		1	1		2
Hypochaeris radicata			1	1	2
Juncus bufonius L. a Juncaceae xx		1		1	2
Lappula squarrosa		1	1		2
Lapsana communis		1	1		2
Lepidium campestre (L.) R. Br. ab Brassicaceae x (1)		1		1	2
Leucanthemum vulgare Lam. I I × ? ? × ? Asteraceae		1		1	2
Lolium multiflorum Lam. ? Poaceae		1		1	2
Lupinus nootkatensis		1	1		2
Lupinus polyphyllus Lindl. ? Fabaceae		1	1		2
Medicago lupulina		1	1		2
Melilotus albus		1	1		2
Myosotis discolor			1	1	2
Myosotis scorpioides		1	1		2
Oxalis corniculata			1	1	2
Poa compressa		1	1		2
Poa trivialis L. p Poaceae x x x		1		1	2
Polygonum aviculare	not sub-antarctic	1	1		2
Prunella vulgaris		1	1		2
Ranunculus acris L. ? × ? ? ? ? Ranunculaceae		1		1	2
Ranunculus repens L. ? ? ? Ranunculaceae		1		1	2
Raphanum raphanistrum L. ab Brassicaceae x x (1)		1		1	2
Rheum rhabarbarum		1	1		2
Rumex acetosa		1	1		2
Salix alaxensis		1	1		2
Sherardia arvensis			1	1	2
Sinapis alba		1	1		2
Sisymbrium altissimum		1	1		2
Sonchus asper		1	1		2
Sonchus oleraceus L. ? ? Asteraceae		1	1		2
Spergularia rubra		1	1		2
Tanacetum vulgare L. × ? ? × ? ? ? ? ? ? Asteraceae		1		1	2
Taraxacum officinale			1	1	2
Trifolium arvense		1	1		2
Trifolium hybridum		1	1		2
Tripleurospermum maritimum		1	1		2
Triticum aestivum		1	1		2
Urtica dioica		1	1		2
Urtica urens		1	1		2
Vicia sativa		1	1		2
Viola arvensis		1	1		2
Vulpia bromoides			1	1	2
Xanthium strumarium		1	1		2
Abutilon theophrasti			1		1
Aegopodium podagraria L. ? × Apiaceae		1			1
Agrostemma githago L. ? ? ? Caryophyllaceae		1			1
Agrostis castellana Boiss. & Reuter p Poaceae xx				1	1
Aira caryophyllea			1		1
Aira praecox L. a Poaceae x (2)				1	1
Alchemilla acutiloba Opiz × ? × Rosaceae		1			1
Alchemilla mollis (Buser) Rothm. ? Rosaceae		1			1
Alchemilla subcrenata Buser × ? ? ? Rosaceae		1			1
Alchemilla wichurae (Buser) Stefansson ? Rosaceae		1			1
Allium cepa L. ? ? ? Amaryllidaceae		1			1
Allium schoenoprasum L. ? Amaryllidaceae		1			1
Alnus alnobetula ssp. sinuata			1		1
Alopecurus myosuroides Huds. ? Poaceae		1			1
Amaranthus hybridus			1		1
Amaranthus tricolor			1		1
Amsinckia lycopsoides Lehm. ? Boraginaceae		1			1
Amsinckia menziessii			1		1
Anagallis arvensis L. a Primulaceae x				1	1
Androsace filiformis Retz. ? ? ? ? ? ? Primulaceae		1			1
Anemone nemorosa L. × Ranunculaceae		1			1
Anethum graveolens L. ? ? Apiaceae		1			1
Anthemis arvensis L. a Asteraceae x (1)				1	1
Anthemis cotula L. a Asteraceae x (1)				1	1
Anthemis ruthenica M. Bieb. ? Asteraceae		1			1
Apera spica-venti (L.) P.Beauv. ? Poaceae		1			1
Aquilegia vulgaris			1		1
Arabidopsis thaliana (L.) Heynh. ? Brassicaceae		1			1
Arctium tomentosum Mill. ? ? ? Asteraceae		1			1
Arctopoa subfastigiata (Trin.) Prob. ? Poaceae		1			1
Arenaria serpyllifolia			1		1
Armoracia sisymbrioides (DC.) Cajander ? Brassicaceae		1			1
Arrhenatherum elatius (L.) Beauv.				1	1
Artemisia absinthium L. ? ? ? Asteraceae		1			1
Artemisia vulgaris L. ? × × ? ? ? ? ? Asteraceae		1			1
Asperugo procumbens L. ? ? ? ? × Boraginaceae		1			1
Astragalus alpinus L. subsp. alpinus ? Fabaceae		1			1
Astragalus danicus Retz. ? Fabaceae		1			1
Atriplex hortensis L. ? Amaranthaceae		1			1
Atriplex prostrata Boucher ex DC. subsp. prostrata × ? Amaranthaceae		1			1
Atriplex sagittata Bkh. ? Amaranthaceae		1			1
Atriplex tatarica L. ? Amaranthaceae		1			1
Avena sativa L. ? ? ? ? ? ? ? Poaceae		1			1
Avenula pubescens (Huds.) Dumort. ? Poaceae		1			1
Axonopus fissifolius			1		1
Axyris amaranthoides L. ? ? ? ? Amaranthaceae		1			1
Barbarea stricta Andrz. ? ? ? ? Brassicaceae		1			1
Barbarea verna (Miller) Ascherson b Brassicaceae x (1)				1	1
Barbarea vulgaris W.T. Aiton ? ? × × ? ? ? ? ? ? ? ? Brassicaceae		1			1
Beckmannia eruciformis subsp. borealis Tzvelev ? ? Poaceae		1			1
Berteroa incana (L.) DC. ? Brassicaceae		1			1
Bidens bipinnata			1		1
Bidens pilosa			1		1
Bistorta officinalis Raf. ? Polygonaceae		1			1
Brachypodium distachya			1		1
Brassica juncea (L.) Czern. ? Brassicaceae		1			1
Brassica rapa L. ? × Brassicaceae		1			1
Bromus arvensis L. ? Poaceae		1			1
Bromus catharticus			1		1
Bromus diandrus			1		1
Bromus rigidus			1		1
Bromus secalinus L. ? Poaceae		1			1
Bromus squarrosus L. ? Poaceae		1			1
Bromus tectorum			1		1
Buglossoides arvensis (L.) I.M. Johnst. ? ? ? Boraginaceae		1			1
Bunias orientalis L. ? Brassicaceae		1			1
Calluna vulgaris (L.) Hull p Ericaceae x				1	1
Camelina microcarpa Andrz. ex DC. ? ? ? Brassicaceae		1			1
Camelina sativa (L.) Crantz ? ? Brassicaceae		1			1
Campanula glomerata L. ? ? ? ? ? × Campanulaceae		1			1
Campanula patula L. ? Campanulaceae		1			1
Caragana arborescens Lam. I × Fabaceae		1			1
Carduus crispus L. ? ? Asteraceae		1			1
Carduus nutans L. ? Asteraceae		1			1
Carex aquatillis Wahlenb. p Cyperaceae x				1	1
Carex muricata			1		1
Carex nigra (L.) Reichard p Cyperaceae x				1	1
Carum carvi L. × ? × ? ? ? Apiaceae		1			1
Centaurea cyanus L. ? ? ? ? Asteraceae		1			1
Centaurea jacea L. ? ? Asteraceae		1			1
Centaurea montana L. ? × Asteraceae		1			1
Centaurea phrygia L. ? Asteraceae		1			1
Centaurea triumfettii All. ? Asteraceae		1			1
Centauria scabiosa L. p Asteraceae x				1	1
Centaurium erythraea			1		1
Centranthus calcitrapa			1		1
Cerastium arvense			1		1
Ceratocephala orthoceras DC. ? Ranunculaceae		1			1
Chaerophyllum prescottii DC. ? Apiaceae		1			1
Chamomilla recutita (L.) Rauschert a Asteraceae x				1	1
Chamomilla suaveolens (Pursh) Rydb. a Asteraceae x				1	1
Chenopodium ficifolium Sm. ? Amaranthaceae		1			1
Chenopodium hircinum			1		1
Chenopodium hybridum			1		1
Chenopodium rubrum L. a Chenopodiaceae x (1)				1	1
Chenopodium suecicum Murr. ? ? Amaranthaceae		1			1
Chenopodium vulvaria			1		1
Chloris truncata			1		1
Chondrilla juncea			1		1
Chorispora tenella (Pall.) DC. ? ? Brassicaceae		1			1
Cichorium intybus L. ? ? Asteraceae		1			1
Cirsium vulgare			1		1
Claytonia sibirica			1		1
Conringia orientalis (L.) Dumort. ? ? ? Brassicaceae		1			1
Consolida regalis S.F. Gray ? Ranunculaceae		1			1
Conyza sumatrensis			1		1
Cosmos bipinnatus			1		1
Cotula australis			1		1
Crataegus orientalis			1		1
Crepis tectorum L. ? ? × ? Asteraceae		1			1
Cynodon dactylon			1		1
Cynoglossum creticum			1		1
Cytisus scoparius			1		1
Deschampsia flexuosa (L.) Trin. p Poaceae x				1	1
Descurania pinnata			1		1
Draba nemorosa L. ? ? ? ? ? ? ? ? Brassicaceae		1			1
Draba verna L. ? × Brassicaceae		1			1
Dracocephalum thymiflorum L. ? ? ? Lamiaceae		1			1
Dysphania ambrosioides			1		1
Echinochloa crus-galli (L.) P. Beauv. ? Poaceae		1			1
Echium vulgare			1		1
Elaeagnus rhamnoides			1		1
Empetrum rubrum Vahl ex Willd. p Ericaceae x				1	1
Epilobium angustifolium			1		1
Epilobium billardierianum			1		1
Epilobium ciliatum subsp. ciliatum Rafin. ? Onagraceae		1			1
Epilobium tetragonum L. p Onagraceae x x (1)				1	1
Eragrostis pilosa			1		1
Eremopyrum orientale (L.) Jaub. & Spach ? Poaceae		1			1
Erica scoparia L. p Ericaceae x				1	1
Erigeron annuus			1		1
Erigeron bonariensis			1		1
Erigeron canadensis			1		1
Erigeron karvinskianus			1		1
Erodium stephanianum Willd. ? Geraniaceae		1			1
Erysimum cheiranthoides L. ? Brassicaceae		1			1
Erysimum repandum L. ? Brassicaceae		1			1
Erysimum strictum P. Gaertn., B. Mey. & Scherb. ? Brassicaceae		1			1
Erysimum virgatum Roth ? Brassicaceae		1			1
Erythranthe guttata (DC.) G.L. Nesom ? Phrymaceae		1			1
Eschscholzia californica			1		1
Euphorbia maculata			1		1
Euphorbia virgata Waldst. & Kit. ? Euphorbiaceae		1			1
Euphrasia parviflora Schag. ? Orobanchaceae		1			1
Fagopyrum esculentum Moench ? ? ? ? ? Polygonaceae		1			1
Fagopyrum tataricum (L.) Gaertn. ? Polygonaceae		1			1
Fumaria muralis			1		1
Fumaria officinalis L. ? Papaveraceae		1			1
Galeopsis bifida Boenn. ? × ? ? ? Lamiaceae		1			1
Galeopsis ladanum L. ? ? Lamiaceae		1			1
Galeopsis speciosa Mill. ? Lamiaceae		1			1
Galeopsis tetrahit L. ? ? ? ? Lamiaceae		1			1
Galinsoga parviflora			1		1
Galium album Mill. ? ? × ? Rubiaceae		1			1
Galium spurium subsp. vaillantii (DC.) Gaudin. ? × ? ? ? Rubiaceae		1			1
Galium uliginosum L. p Rubiaceae x				1	1
Galium verum L. × ? ? × Rubiaceae		1			1
Gaudinia fragilis				1	1
Geranium soboliferum Kom. ? Geraniaceae		1			1
Geranium wlassovianum Fisch. ex Link ? Geraniaceae		1			1
Geum aleppicum Jacq. ? Rosaceae		1			1
Geum macrophyllum Willd. ? Rosaceae		1			1
Glechoma hederacea L. × ? ? Lamiaceae		1			1
Glyceria fluitans			1		1
Gnaphalium uliginosum L. ? ? Asteraceae		1			1
Helianthus annuus L. ? ? ? ? ? Asteraceae		1			1
Helictotrichon pubescens			1		1
Heracleum persicum Desf. ? ? Apiaceae		1			1
Hesperis matronalis L. ? Brassicaceae		1			1
Heterotheca grandiflora			1		1
Hieracium vulgatum R.E. Fr. ? Asteraceae		1			1
Holcus mollis L. p Poaceae x x (2)				1	1
Hordeum brevisubulatum (Trin.) Link ? ? ? Poaceae		1			1
Hordeum murinum			1		1
Hordeum muticum			1		1
Hordeum vulgare L. ? × ? ? ? ? Poaceae		1			1
Hyoscyamus niger L. ? Solanaceae		1			1
Hypericum humifusum L. p Hypericaceae x				1	1
Ipomoea nil			1		1
Ipomoea purpurea			1		1
Iris pseudacorus L. ? Iridaceae		1			1
Isatis tinctoria L. ? Brassicaceae		1			1
Jacobaea erucifolia (L.) G. Gaertn., B. Mey. & Scherb. ? Asteraceae		1			1
Juncus acutiflorus E. Hrh. ex Hoffm. p Juncaceae x x (2)				1	1
Juncus compressus Jacq. ? Juncaceae		1			1
Juncus conglomeratus L. p Juncaceae x				1	1
Juncus filiformis L. p Juncaceae x				1	1
Knautia arvensis (L.) Coulter ? Caprifoliaceae		1			1
Lachnagrostis filiformis			1		1
Lactuca serriola			1		1
Lamium album L. ? Lamiaceae		1			1
Lamium amplexicaule			1		1
Lamium purpureum L. ? ? ? Lamiaceae		1			1
Lappula marginata (M. Bieb.) Gürke ? Boraginaceae		1			1
Lappula occidentalis (S. Watson) Greene ? × Boraginaceae		1			1
Lathyrus pratensis L. ? × ? Fabaceae		1			1
Leontodon hispidus L. ? Asteraceae		1			1
Leontodon taraxacoides (Vill.) Merat p Asteraceae x				1	1
Leonurus glaucescens Bunge ? Lamiaceae		1			1
Lepidium densiflorum Schrad. ? ? ? Brassicaceae		1			1
Lepidium didymum			1		1
Lepidium heterophyllum Benth. ? Brassicaceae		1			1
Lepidium perfoliatum L. ? Brassicaceae		1			1
Lepidium ramosissimum A. Nelson ? Brassicaceae		1			1
Lepidium ruderale L. ? ? ? Brassicaceae		1			1
Lepidium sativum L. ? ? Brassicaceae		1			1
Lepidium virginicum			1		1
Lepidotheca suaveolens (Pursh) Nutt. ? ? ? × × ? ? × ? ? ? ? Asteraceae		1			1
Leptopyrum fumarioides (L.) Rchb. ? Ranunculaceae		1			1
Linaria vulgaris Mill. ? I × ? × ? ? Plantaginaceae		1			1
Linum usitatissimum L. ? Linaceae		1			1
Lolium temulentum L. ? Poaceae		1			1
Lotus corniculatus L. p Fabaceae x				1	1
Luzula campestris L. p Juncaceae x (2–3)				1	1
Luzula multiflora (Retz.) Lej. p Juncaceae x (3)				1	1
Lycopsis arvensis L. subsp. arvensis ? Boraginaceae		1			1
Lysimachia arvensis U.Manns & Anderb. ? Primulaceae		1			1
Malus baccata (L.) Borkh. ? Rosaceae		1			1
Malus pumila Mill. ? ? × ? ? ? ? Rosaceae		1			1
Malva neglecta Wallr. ? Malvaceae		1			1
Malva pusilla Sm. ? Malvaceae		1			1
Matricaria discoidea			1		1
Matricaria perforata Merat a Asteraceae x				1	1
Matricaria recutita L. × ? × ? Asteraceae		1			1
Medicago falcata L. ? ? Fabaceae		1			1
Medicago platycarpa (L.) Trautv. ? Fabaceae		1			1
Medicago polymorpha L. ? Fabaceae		1			1
Melilotus suaveolens Ledeb. ? Fabaceae		1			1
Mentha arvensis L. ? Lamiaceae		1			1
Mirabilis jalapa			1		1
Myosotis arvensis (L.) Hill ? × ? ? ? Boraginaceae		1			1
Myosotis laxa subsp. caespitosa (C.F. Schultz) Nordh. × ? ? ? Boraginaceae		1			1
Myosurus minimus L. ? Ranunculaceae		1			1
Myrrhis odorata (L.) Scop. ? Apiaceae		1			1
Nardus stricta L. p Poaceae x				1	1
Nassella cernua			1		1
Nasturtium officinale			1		1
Neslia paniculata (L.) Desv. ? ? Brassicaceae		1			1
Nicandra physalodes			1		1
Oenothera rosea			1		1
Oenothera sandiana			1		1
Oenothera stricta			1		1
Oxalis debilis			1		1
Oxalis pes-caprae			1		1
Oxybasis glauca S. Fuentes, Uotila & Borsch ? ? ? Amaranthaceae		1			1
Oxybasis rubra (L.) S. Fuentes, Uotila & Borsch ? ? Amaranthaceae		1			1
Oxybasis urbica (L.) S. Fuentes, Uotila & Borsch ? ? ? Amaranthaceae		1			1
Panicum miliaceum L. ? Poaceae		1			1
Papaver croceum Ledeb. ? ? ? ? ? × Papaveraceae		1			1
Papaver nudicaule			1		1
Papaver somniferum L. ? ? ? Papaveraceae		1			1
Parietaria debilis			1		1
Pennisetum clandestinum			1		1
Persicaria lapathifolia (L.) S.F. Gray ? ? ? ? Polygonaceae		1			1
Persicaria maculosa S.F. Gray ? ? Polygonaceae		1			1
Phleum alpinum			1		1
Pilosella aurantiaca F. Schultz & Sch. Bip. ? × Asteraceae		1			1
Pilosella officinarum			1		1
Pilosella piloselloides			1		1
Pimpinella saxifraga L. × ? Apiaceae		1			1
Pisum sativum L. ? ? Fabaceae		1			1
Plantago canescens Adams subsp. canescens ? Plantaginaceae		1			1
Plantago depressa Willd. × ? ? ? Plantaginaceae		1			1
Plantago major L. ? ? ? ? × × ? × ? ? ? ? ? Plantaginaceae		1			1
Plantago media L. ? ? ? ? ? Plantaginaceae		1			1
Plantago salsa Pall. ? Plantaginaceae		1			1
Poa cf. palustris L. p Poaceae x				1	1
Poa nemoralis L. p Poaceae x				1	1
Poa palustris L. ? × ? Poaceae		1			1
Poa supina Schrad. ? Poaceae		1			1
Polemonium caeruleum L. ? Polemoniaceae		1			1
Polycarpon tetraphyllum			1		1
Polygala comosa Schkuhr ? Polygalaceae		1			1
Potentilla argentea L. × ? ? Rosaceae		1			1
Potentilla bifurca L. ? Rosaceae		1			1
Potentilla erecta (L.) Räuschel ? Rosaceae		1			1
Potentilla intermedia L. × ? ? Rosaceae		1			1
Potentilla norvegica L. ? ? ? × ? ? ? × Rosaceae		1			1
Potentilla tergemina Soják ? Rosaceae		1			1
Pratia repens Gaudich. p Campanulaceae x				1	1
Primula elatior L. ? Primulaceae		1			1
Prunus domestica L. ? Rosaceae		1			1
Prunus padus L. I Rosaceae		1			1
Prunus persica			1		1
Puccinellia distans (Jacq.) Parl. ? ? ? ? ? Poaceae		1			1
Puccinellia hauptiana (Trin. ex V.I. Krecz.) Kitag. ? ? ? ? ? ? ? ? Poaceae		1			1
Ranunculus auricomus agg. ? ? Ranunculaceae		1			1
Ranunculus polyanthemos L. ? Ranunculaceae		1			1
Ranunculus sceleratus L. subsp. sceleratus ? ? ? Ranunculaceae		1			1
Ranunculus subborealis subsp. villosus (Drabble) Elven ? Ranunculaceae		1			1
Raphanus sativus L. ? Brassicaceae		1			1
Reseda lutea L. ? Resedaceae		1			1
Rhinanthus angustifolius C.C. Gmelin ? ? ? ? Orobanchaceae		1			1
Rhinanthus minor L. ? Orobanchaceae		1			1
Ribes × pallidum Otto & F. Dietr. ? Grossulariaceae		1			1
Roripa austriaca (Crantz) Besser a Brassicaceae x (1)				1	1
Rorippa barbareifolia (DC.) Kitag. ? ? Brassicaceae		1			1
Rorippa palustris subsp. palustris (L.) Besser ? ? Brassicaceae		1			1
Rorippa sylvestris subsp. sylvestris (L.) Besser ? ? Brassicaceae		1			1
Rubus idaeus L. subsp. idaeus ? Rosaceae		1			1
Rumex aquaticus L. ? ? ? ? ? ? Polygonaceae		1			1
Rumex confertus Willd. × ? Polygonaceae		1			1
Rumex conglomeratus Murr. p Polygonaceae x x				1	1
Rumex longifolius DC. ? ? ? × ? ? ? ? ? ? Polygonaceae		1			1
Rumex maritimus L. ? × Polygonaceae		1			1
Rumex obtusifolius L. subsp. obtusifolius ? Polygonaceae		1			1
Rumex pseudonatronatus (Borb.) Borb. ex Murb. ? ? Polygonaceae		1			1
Rumex thyrsiflorus Fingerh. ? Polygonaceae		1			1
Rumex ucranicus Fisch. ? Polygonaceae		1			1
Salix myrsinifolia subsp. borealis (Flod.) A.K. Skvortsov ? Salicaceae		1			1
Salsola kali			1		1
Sanguisorba alpina Bunge ? Rosaceae		1			1
Sanguisorba officinalis L. ? Rosaceae		1			1
Saussurea alpina (L.) DC. ? Asteraceae		1			1
Saxifraga umbrosa L. ? Saxifragaceae		1			1
Schedonorus pratensis (Huds.) P. Beauv. × ? ? × ? ? ? Poaceae		1			1
Scleranthus annuus L. ? Caryophyllaceae		1			1
Scorzoneroides autumnalis Moench ? ? × ? ? ? Asteraceae		1			1
Secale cereale L. ? ? ? ? Poaceae		1			1
Senecio dubitabilis C. Jeffrey & Y.L. Chen ? Asteraceae		1			1
Senecio jacobaea L. p Asteraceae x				1	1
Senecio madagascariensis			1		1
Senecio pseudoarnica Less. ? Asteraceae		1			1
Senecio rupestris			1		1
Senecio sylvaticus			1		1
Senecio vernalis Waldst. & Kit. ? Asteraceae		1			1
Senecio viscosus L. ? Asteraceae		1			1
Setaria viridis (L.) P. Beauv. ? Poaceae		1			1
Silene dioica subsp. dioica (L.) Clairv. ? Caryophyllaceae		1			1
Silene flos-cuculi (L.) Greuter & Burdet ? ? Caryophyllaceae		1			1
Silene gallica			1		1
Silene latifolia subsp. alba (Miller) Greuter & Burdet ? ? ? ? ? ? Caryophyllaceae		1			1
Silene noctiflora L. ? ? Caryophyllaceae		1			1
Silene vulgaris (Moench) Garcke subsp. vulgaris ? × ? × ? ? ? Caryophyllaceae		1			1
Silybum marianum			1		1
Sisymbrium irio			1		1
Sisymbrium loeselii L. ? ? ? Brassicaceae		1			1
Sisymbrium orientale			1		1
Sisymbrium polymorphum (Murray) Roth ? Brassicaceae		1			1
Sisymbrium volgense M. Bieb. ex E. Fourn. ? Brassicaceae		1			1
Solanum lycopersicum L. ? Solanaceae		1			1
Solanum nigrum L. ? Solanaceae		1			1
Solanum tuberosum L. ? Solanaceae		1			1
Sonchus arvensis L. ? × × ? Asteraceae		1			1
Spergula arvensis L. ? ? Caryophyllaceae		1			1
Sphallerocarpus gracilis (Besser ex Trevir.) Koso-Pol. × ? Apiaceae		1			1
Stachys palustris L. ? Lamiaceae		1			1
Stellaria alsine Grimm p Caryophyllaceae xx x (2)				1	1
Stellaria graminea			1		1
Stellaria pallida			1		1
Symphytum asperum Lepechin × ? Boraginaceae		1			1
Symphytum officinale			1		1
Tagetes minuta			1		1
Tanacetum parthenium			1		1
Taraxacum erythrospermum group p Asteraceae x xx				1	1
Taraxacum ruderalia agg. ? ? × ? ? ? ? ? ? Asteraceae		1			1
Tetramolopium humile			1		1
Thlaspi arvense L. ? ? × ? ? ? × ? ? ? ? Brassicaceae		1			1
Tragopogon orientalis L. ? Asteraceae		1			1
Tragopogon porrifolius			1		1
Trifolium lupinaster L. × ? Fabaceae		1			1
Trifolium pratense L. ? × ? ? × ? ? ? ? Fabaceae		1			1
Trifolium spadiceum L. ? ? Fabaceae		1			1
Trifolium variegatum Torr. & A. Gray ? Fabaceae		1			1
Tripleurospermum inodorum (L.) Sch.-Bip ? × ? ? × ? ? ? ? ? ? Asteraceae		1			1
Tripleurospermum tetragonospermum (F. Schmidt) Pobed. ? ? Asteraceae		1			1
Trisetum spicatum (L.) Rich. p Poaceae x (2)				1	1
Tussilago farfara L. ? Asteraceae		1			1
Ulex minor Roth. p Fabaceae x				1	1
Urtica cannabina L. ? Urticaceae		1			1
Vaccaria hispanica (Mill.) Rauschert ? Caryophyllaceae		1			1
Vaccinium vitis-idaea L. p Ericaceae x				1	1
Valeriana officinalis L. ? Caprifoliaceae		1			1
Verbascum pulverulentum			1		1
Verbascum thapsus			1		1
Verbascum virgatum			1		1
Verbesina encelioides			1		1
Veronica anagallis-aquatica			1		1
Veronica arvensis			1		1
Veronica gentianoides Vahl ? Plantaginaceae		1			1
Veronica longifolia L. ? Plantaginaceae		1			1
Veronica officinalis L. ? ? Plantaginaceae		1			1
Veronica peregrina			1		1
Veronica persica			1		1
Vicia angustifolia L. ? Fabaceae		1			1
Vicia cracca L. IT IT × Fabaceae		1			1
Vicia hirsuta (L.) Gray ? ? Fabaceae		1			1
Vicia sepium L. ? × Fabaceae		1			1
Vicia tenuifolia Roth ? Fabaceae		1			1
Vicia tetrasperma (L.) Schreb. ? Fabaceae		1			1
Vulpia myuros			1		1
Wahlenbergia gracilis			1		1
Xanthium spinosum			1		1

## Sheet: Sheet1
Species	Alpine and Arctic	Arctic	Alpine and sub-alpine	Sub-antarctic	Number of regions
	Alexander et al. (2016) Wasowicz et al. (2019)	Wasowicz et al. (2019)	McDougall et al. (2011)	Frenot et al. (2005)
Achillea millefolium	*	1	1	1	3
Agrostis capillaris		1	1	1	3
Agrostis gigantea		1	1	1	3
Agrostis stolonifera		1	1	1	3
Alopecurus geniculatus		1	1	1	3
Alopecurus pratensis		1	1	1	3
Bromus hordeaceus		1	1	1	3
Capsella bursa-pastoris	*	1	1	1	3
Cerastium fontanum	*	1	1	1	3
Dactylis glomerata	*	1	1	1	3
Deschampsia caespitosa		1	1	1	3
Festuca ovina		1	1	1	3
Festuca rubra	*	1	1	1	3
Lolium perenne	*	1	1	1	3
Medicago sativa		1	1	1	3
Melilotus officinalis		1	1	1	3
Phleum pratense	*	1	1	1	3
Plantago lanceolata	*	1	1	1	3
Poa annua	*	1	1	1	3
Poa pratensis	*	1	1	1	3
Rumex acetosella	*	1	1	1	3
Rumex crispus	*	1	1	1	3
Sagina procumbens		1	1	1	3
Senecio vulgaris		1	1	1	3
Sinapis arvensis		1	1	1	3
Stellaria media	*	1	1	1	3
Trifolium repens	*	1	1	1	3
Veronica serpyllifolia		1	1	1	3
2 of three regions
Achillea ptarmica		1		1	2
Agrostis canina		1		1	2
Alchemilla monticola		1		1	2
Amaranthus retroflexus		1	1		2
Anthoxanthum odoratum			1	1	2
Anthriscus sylvestris		1		1	2
Avena fatua		1	1		2
Bellis perennis		1		1	2
Bidens tripartita		1	1		2
Brassica napus		1		1	2
Brassica oleracea		1		1	2
Bromus inermis		1	1		2
Cannabis sativa		1	1		2
Cerastium glomeratum			1	1	2
Chenopodium album		1	1		2
Cirsium arvense		1		1	2
Convolvulus arvensis		1	1		2
Datura stramonium		1	1		2
Descurainia sophia		1	1		2
Elymus repens		1		1	2
Erodium cicutarium	*	1	1		2
Fallopia convolvulus		1	1		2
Festuca arundinacea			1	1	2
Galium aparine		1		1	2
Galium mollugo		1		1	2
Holcus lanatus			1	1	2
Hordeum distichon		1		1	2
Hordeum jubatum		1	1		2
Hypochaeris radicata			1	1	2
Juncus bufonius		1		1	2
Lappula squarrosa		1	1		2
Lapsana communis		1	1		2
Lepidium campestre		1		1	2
Leucanthemum vulgare		1		1	2
Lolium multiflorum		1		1	2
Lupinus nootkatensis		1	1		2
Lupinus polyphyllus		1	1		2
Medicago lupulina		1	1		2
Melilotus albus		1	1		2
Myosotis discolor			1	1	2
Myosotis scorpioides		1	1		2
Oxalis corniculata			1	1	2
Poa compressa		1	1		2
Poa trivialis		1		1	2
Polygonum aviculare	*	1	1		2
Prunella vulgaris		1	1		2
Ranunculus acris		1		1	2
Ranunculus repens		1		1	2
Raphanum raphanistrum		1		1	2
Rheum rhabarbarum		1	1		2
Rumex acetosa		1	1		2
Salix alaxensis		1	1		2
Sherardia arvensis			1	1	2
Sinapis alba		1	1		2
Sisymbrium altissimum		1	1		2
Sonchus asper		1	1		2
Sonchus oleraceus		1	1		2
Spergularia rubra		1	1		2
Tanacetum vulgare		1		1	2
Taraxacum officinale			1	1	2
Trifolium arvense		1	1		2
Trifolium hybridum		1	1		2
Tripleurospermum maritimum		1	1		2
Triticum aestivum		1	1		2
Urtica dioica		1	1		2
Urtica urens		1	1		2
Vicia sativa		1	1		2
Viola arvensis		1	1		2
Vulpia bromoides			1	1	2
Xanthium strumarium		1	1		2
Abutilon theophrasti			1		1
Aegopodium podagraria L. ? × Apiaceae		1			1
Agrostemma githago L. ? ? ? Caryophyllaceae		1			1
Agrostis castellana Boiss. & Reuter p Poaceae xx				1	1
Aira caryophyllea			1		1
Aira praecox L. a Poaceae x (2)				1	1
Alchemilla acutiloba Opiz × ? × Rosaceae		1			1
Alchemilla mollis (Buser) Rothm. ? Rosaceae		1			1
Alchemilla subcrenata Buser × ? ? ? Rosaceae		1			1
Alchemilla wichurae (Buser) Stefansson ? Rosaceae		1			1
Allium cepa L. ? ? ? Amaryllidaceae		1			1
Allium schoenoprasum L. ? Amaryllidaceae		1			1
Alnus alnobetula ssp. sinuata			1		1
Alopecurus myosuroides Huds. ? Poaceae		1			1
Amaranthus hybridus			1		1
Amaranthus tricolor			1		1
Amsinckia lycopsoides Lehm. ? Boraginaceae		1			1
Amsinckia menziessii			1		1
Anagallis arvensis L. a Primulaceae x				1	1
Androsace filiformis Retz. ? ? ? ? ? ? Primulaceae		1			1
Anemone nemorosa L. × Ranunculaceae		1			1
Anethum graveolens L. ? ? Apiaceae		1			1
Anthemis arvensis L. a Asteraceae x (1)				1	1
Anthemis cotula L. a Asteraceae x (1)				1	1
Anthemis ruthenica M. Bieb. ? Asteraceae		1			1
Apera spica-venti (L.) P.Beauv. ? Poaceae		1			1
Aquilegia vulgaris			1		1
Arabidopsis thaliana (L.) Heynh. ? Brassicaceae		1			1
Arctium tomentosum Mill. ? ? ? Asteraceae		1			1
Arctopoa subfastigiata (Trin.) Prob. ? Poaceae		1			1
Arenaria serpyllifolia			1		1
Armoracia sisymbrioides (DC.) Cajander ? Brassicaceae		1			1
Arrhenatherum elatius (L.) Beauv.				1	1
Artemisia absinthium L. ? ? ? Asteraceae		1			1
Artemisia vulgaris L. ? × × ? ? ? ? ? Asteraceae		1			1
Asperugo procumbens L. ? ? ? ? × Boraginaceae		1			1
Astragalus alpinus L. subsp. alpinus ? Fabaceae		1			1
Astragalus danicus Retz. ? Fabaceae		1			1
Atriplex hortensis L. ? Amaranthaceae		1			1
Atriplex prostrata Boucher ex DC. subsp. prostrata × ? Amaranthaceae		1			1
Atriplex sagittata Bkh. ? Amaranthaceae		1			1
Atriplex tatarica L. ? Amaranthaceae		1			1
Avena sativa L. ? ? ? ? ? ? ? Poaceae		1			1
Avenula pubescens (Huds.) Dumort. ? Poaceae		1			1
Axonopus fissifolius			1		1
Axyris amaranthoides L. ? ? ? ? Amaranthaceae		1			1
Barbarea stricta Andrz. ? ? ? ? Brassicaceae		1			1
Barbarea verna (Miller) Ascherson b Brassicaceae x (1)				1	1
Barbarea vulgaris W.T. Aiton ? ? × × ? ? ? ? ? ? ? ? Brassicaceae		1			1
Beckmannia eruciformis subsp. borealis Tzvelev ? ? Poaceae		1			1
Berteroa incana (L.) DC. ? Brassicaceae		1			1
Bidens bipinnata			1		1
Bidens pilosa			1		1
Bistorta officinalis Raf. ? Polygonaceae		1			1
Brachypodium distachya			1		1
Brassica juncea (L.) Czern. ? Brassicaceae		1			1
Brassica rapa L. ? × Brassicaceae		1			1
Bromus arvensis L. ? Poaceae		1			1
Bromus catharticus			1		1
Bromus diandrus			1		1
Bromus rigidus			1		1
Bromus secalinus L. ? Poaceae		1			1
Bromus squarrosus L. ? Poaceae		1			1
Bromus tectorum			1		1
Buglossoides arvensis (L.) I.M. Johnst. ? ? ? Boraginaceae		1			1
Bunias orientalis L. ? Brassicaceae		1			1
Calluna vulgaris (L.) Hull p Ericaceae x				1	1
Camelina microcarpa Andrz. ex DC. ? ? ? Brassicaceae		1			1
Camelina sativa (L.) Crantz ? ? Brassicaceae		1			1
Campanula glomerata L. ? ? ? ? ? × Campanulaceae		1			1
Campanula patula L. ? Campanulaceae		1			1
Caragana arborescens Lam. I × Fabaceae		1			1
Carduus crispus L. ? ? Asteraceae		1			1
Carduus nutans L. ? Asteraceae		1			1
Carex aquatillis Wahlenb. p Cyperaceae x				1	1
Carex muricata			1		1
Carex nigra (L.) Reichard p Cyperaceae x				1	1
Carum carvi L. × ? × ? ? ? Apiaceae		1			1
Centaurea cyanus L. ? ? ? ? Asteraceae		1			1
Centaurea jacea L. ? ? Asteraceae		1			1
Centaurea montana L. ? × Asteraceae		1			1
Centaurea phrygia L. ? Asteraceae		1			1
Centaurea triumfettii All. ? Asteraceae		1			1
Centauria scabiosa L. p Asteraceae x				1	1
Centaurium erythraea			1		1
Centranthus calcitrapa			1		1
Cerastium arvense			1		1
Ceratocephala orthoceras DC. ? Ranunculaceae		1			1
Chaerophyllum prescottii DC. ? Apiaceae		1			1
Chamomilla recutita (L.) Rauschert a Asteraceae x				1	1
Chamomilla suaveolens (Pursh) Rydb. a Asteraceae x				1	1
Chenopodium ficifolium Sm. ? Amaranthaceae		1			1
Chenopodium hircinum			1		1
Chenopodium hybridum			1		1
Chenopodium rubrum L. a Chenopodiaceae x (1)				1	1
Chenopodium suecicum Murr. ? ? Amaranthaceae		1			1
Chenopodium vulvaria			1		1
Chloris truncata			1		1
Chondrilla juncea			1		1
Chorispora tenella (Pall.) DC. ? ? Brassicaceae		1			1
Cichorium intybus L. ? ? Asteraceae		1			1
Cirsium vulgare			1		1
Claytonia sibirica			1		1
Conringia orientalis (L.) Dumort. ? ? ? Brassicaceae		1			1
Consolida regalis S.F. Gray ? Ranunculaceae		1			1
Conyza sumatrensis			1		1
Cosmos bipinnatus			1		1
Cotula australis			1		1
Crataegus orientalis			1		1
Crepis tectorum L. ? ? × ? Asteraceae		1			1
Cynodon dactylon			1		1
Cynoglossum creticum			1		1
Cytisus scoparius			1		1
Deschampsia flexuosa (L.) Trin. p Poaceae x				1	1
Descurania pinnata			1		1
Draba nemorosa L. ? ? ? ? ? ? ? ? Brassicaceae		1			1
Draba verna L. ? × Brassicaceae		1			1
Dracocephalum thymiflorum L. ? ? ? Lamiaceae		1			1
Dysphania ambrosioides			1		1
Echinochloa crus-galli (L.) P. Beauv. ? Poaceae		1			1
Echium vulgare			1		1
Elaeagnus rhamnoides			1		1
Empetrum rubrum Vahl ex Willd. p Ericaceae x				1	1
Epilobium angustifolium			1		1
Epilobium billardierianum			1		1
Epilobium ciliatum subsp. ciliatum Rafin. ? Onagraceae		1			1
Epilobium tetragonum L. p Onagraceae x x (1)				1	1
Eragrostis pilosa			1		1
Eremopyrum orientale (L.) Jaub. & Spach ? Poaceae		1			1
Erica scoparia L. p Ericaceae x				1	1
Erigeron annuus			1		1
Erigeron bonariensis			1		1
Erigeron canadensis			1		1
Erigeron karvinskianus			1		1
Erodium stephanianum Willd. ? Geraniaceae		1			1
Erysimum cheiranthoides L. ? Brassicaceae		1			1
Erysimum repandum L. ? Brassicaceae		1			1
Erysimum strictum P. Gaertn., B. Mey. & Scherb. ? Brassicaceae		1			1
Erysimum virgatum Roth ? Brassicaceae		1			1
Erythranthe guttata (DC.) G.L. Nesom ? Phrymaceae		1			1
Eschscholzia californica			1		1
Euphorbia maculata			1		1
Euphorbia virgata Waldst. & Kit. ? Euphorbiaceae		1			1
Euphrasia parviflora Schag. ? Orobanchaceae		1			1
Fagopyrum esculentum Moench ? ? ? ? ? Polygonaceae		1			1
Fagopyrum tataricum (L.) Gaertn. ? Polygonaceae		1			1
Fumaria muralis			1		1
Fumaria officinalis L. ? Papaveraceae		1			1
Galeopsis bifida Boenn. ? × ? ? ? Lamiaceae		1			1
Galeopsis ladanum L. ? ? Lamiaceae		1			1
Galeopsis speciosa Mill. ? Lamiaceae		1			1
Galeopsis tetrahit L. ? ? ? ? Lamiaceae		1			1
Galinsoga parviflora			1		1
Galium album Mill. ? ? × ? Rubiaceae		1			1
Galium spurium subsp. vaillantii (DC.) Gaudin. ? × ? ? ? Rubiaceae		1			1
Galium uliginosum L. p Rubiaceae x				1	1
Galium verum L. × ? ? × Rubiaceae		1			1
Gaudinia fragilis				1	1
Geranium soboliferum Kom. ? Geraniaceae		1			1
Geranium wlassovianum Fisch. ex Link ? Geraniaceae		1			1
Geum aleppicum Jacq. ? Rosaceae		1			1
Geum macrophyllum Willd. ? Rosaceae		1			1
Glechoma hederacea L. × ? ? Lamiaceae		1			1
Glyceria fluitans			1		1
Gnaphalium uliginosum L. ? ? Asteraceae		1			1
Helianthus annuus L. ? ? ? ? ? Asteraceae		1			1
Helictotrichon pubescens			1		1
Heracleum persicum Desf. ? ? Apiaceae		1			1
Hesperis matronalis L. ? Brassicaceae		1			1
Heterotheca grandiflora			1		1
Hieracium vulgatum R.E. Fr. ? Asteraceae		1			1
Holcus mollis L. p Poaceae x x (2)				1	1
Hordeum brevisubulatum (Trin.) Link ? ? ? Poaceae		1			1
Hordeum murinum			1		1
Hordeum muticum			1		1
Hordeum vulgare L. ? × ? ? ? ? Poaceae		1			1
Hyoscyamus niger L. ? Solanaceae		1			1
Hypericum humifusum L. p Hypericaceae x				1	1
Ipomoea nil			1		1
Ipomoea purpurea			1		1
Iris pseudacorus L. ? Iridaceae		1			1
Isatis tinctoria L. ? Brassicaceae		1			1
Jacobaea erucifolia (L.) G. Gaertn., B. Mey. & Scherb. ? Asteraceae		1			1
Juncus acutiflorus E. Hrh. ex Hoffm. p Juncaceae x x (2)				1	1
Juncus compressus Jacq. ? Juncaceae		1			1
Juncus conglomeratus L. p Juncaceae x				1	1
Juncus filiformis L. p Juncaceae x				1	1
Knautia arvensis (L.) Coulter ? Caprifoliaceae		1			1
Lachnagrostis filiformis			1		1
Lactuca serriola			1		1
Lamium album L. ? Lamiaceae		1			1
Lamium amplexicaule			1		1
Lamium purpureum L. ? ? ? Lamiaceae		1			1
Lappula marginata (M. Bieb.) Gürke ? Boraginaceae		1			1
Lappula occidentalis (S. Watson) Greene ? × Boraginaceae		1			1
Lathyrus pratensis L. ? × ? Fabaceae		1			1
Leontodon hispidus L. ? Asteraceae		1			1
Leontodon taraxacoides (Vill.) Merat p Asteraceae x				1	1
Leonurus glaucescens Bunge ? Lamiaceae		1			1
Lepidium densiflorum Schrad. ? ? ? Brassicaceae		1			1
Lepidium didymum			1		1
Lepidium heterophyllum Benth. ? Brassicaceae		1			1
Lepidium perfoliatum L. ? Brassicaceae		1			1
Lepidium ramosissimum A. Nelson ? Brassicaceae		1			1
Lepidium ruderale L. ? ? ? Brassicaceae		1			1
Lepidium sativum L. ? ? Brassicaceae		1			1
Lepidium virginicum			1		1
Lepidotheca suaveolens (Pursh) Nutt. ? ? ? × × ? ? × ? ? ? ? Asteraceae		1			1
Leptopyrum fumarioides (L.) Rchb. ? Ranunculaceae		1			1
Linaria vulgaris Mill. ? I × ? × ? ? Plantaginaceae		1			1
Linum usitatissimum L. ? Linaceae		1			1
Lolium temulentum L. ? Poaceae		1			1
Lotus corniculatus L. p Fabaceae x				1	1
Luzula campestris L. p Juncaceae x (2–3)				1	1
Luzula multiflora (Retz.) Lej. p Juncaceae x (3)				1	1
Lycopsis arvensis L. subsp. arvensis ? Boraginaceae		1			1
Lysimachia arvensis U.Manns & Anderb. ? Primulaceae		1			1
Malus baccata (L.) Borkh. ? Rosaceae		1			1
Malus pumila Mill. ? ? × ? ? ? ? Rosaceae		1			1
Malva neglecta Wallr. ? Malvaceae		1			1
Malva pusilla Sm. ? Malvaceae		1			1
Matricaria discoidea			1		1
Matricaria perforata Merat a Asteraceae x				1	1
Matricaria recutita L. × ? × ? Asteraceae		1			1
Medicago falcata L. ? ? Fabaceae		1			1
Medicago platycarpa (L.) Trautv. ? Fabaceae		1			1
Medicago polymorpha L. ? Fabaceae		1			1
Melilotus suaveolens Ledeb. ? Fabaceae		1			1
Mentha arvensis L. ? Lamiaceae		1			1
Mirabilis jalapa			1		1
Myosotis arvensis (L.) Hill ? × ? ? ? Boraginaceae		1			1
Myosotis laxa subsp. caespitosa (C.F. Schultz) Nordh. × ? ? ? Boraginaceae		1			1
Myosurus minimus L. ? Ranunculaceae		1			1
Myrrhis odorata (L.) Scop. ? Apiaceae		1			1
Nardus stricta L. p Poaceae x				1	1
Nassella cernua			1		1
Nasturtium officinale			1		1
Neslia paniculata (L.) Desv. ? ? Brassicaceae		1			1
Nicandra physalodes			1		1
Oenothera rosea			1		1
Oenothera sandiana			1		1
Oenothera stricta			1		1
Oxalis debilis			1		1
Oxalis pes-caprae			1		1
Oxybasis glauca S. Fuentes, Uotila & Borsch ? ? ? Amaranthaceae		1			1
Oxybasis rubra (L.) S. Fuentes, Uotila & Borsch ? ? Amaranthaceae		1			1
Oxybasis urbica (L.) S. Fuentes, Uotila & Borsch ? ? ? Amaranthaceae		1			1
Panicum miliaceum L. ? Poaceae		1			1
Papaver croceum Ledeb. ? ? ? ? ? × Papaveraceae		1			1
Papaver nudicaule			1		1
Papaver somniferum L. ? ? ? Papaveraceae		1			1
Parietaria debilis			1		1
Pennisetum clandestinum			1		1
Persicaria lapathifolia (L.) S.F. Gray ? ? ? ? Polygonaceae		1			1
Persicaria maculosa S.F. Gray ? ? Polygonaceae		1			1
Phleum alpinum			1		1
Pilosella aurantiaca F. Schultz & Sch. Bip. ? × Asteraceae		1			1
Pilosella officinarum			1		1
Pilosella piloselloides			1		1
Pimpinella saxifraga L. × ? Apiaceae		1			1
Pisum sativum L. ? ? Fabaceae		1			1
Plantago canescens Adams subsp. canescens ? Plantaginaceae		1			1
Plantago depressa Willd. × ? ? ? Plantaginaceae		1			1
Plantago major L. ? ? ? ? × × ? × ? ? ? ? ? Plantaginaceae		1			1
Plantago media L. ? ? ? ? ? Plantaginaceae		1			1
Plantago salsa Pall. ? Plantaginaceae		1			1
Poa cf. palustris L. p Poaceae x				1	1
Poa nemoralis L. p Poaceae x				1	1
Poa palustris L. ? × ? Poaceae		1			1
Poa supina Schrad. ? Poaceae		1			1
Polemonium caeruleum L. ? Polemoniaceae		1			1
Polycarpon tetraphyllum			1		1
Polygala comosa Schkuhr ? Polygalaceae		1			1
Potentilla argentea L. × ? ? Rosaceae		1			1
Potentilla bifurca L. ? Rosaceae		1			1
Potentilla erecta (L.) Räuschel ? Rosaceae		1			1
Potentilla intermedia L. × ? ? Rosaceae		1			1
Potentilla norvegica L. ? ? ? × ? ? ? × Rosaceae		1			1
Potentilla tergemina Soják ? Rosaceae		1			1
Pratia repens Gaudich. p Campanulaceae x				1	1
Primula elatior L. ? Primulaceae		1			1
Prunus domestica L. ? Rosaceae		1			1
Prunus padus L. I Rosaceae		1			1
Prunus persica			1		1
Puccinellia distans (Jacq.) Parl. ? ? ? ? ? Poaceae		1			1
Puccinellia hauptiana (Trin. ex V.I. Krecz.) Kitag. ? ? ? ? ? ? ? ? Poaceae		1			1
Ranunculus auricomus agg. ? ? Ranunculaceae		1			1
Ranunculus polyanthemos L. ? Ranunculaceae		1			1
Ranunculus sceleratus L. subsp. sceleratus ? ? ? Ranunculaceae		1			1
Ranunculus subborealis subsp. villosus (Drabble) Elven ? Ranunculaceae		1			1
Raphanus sativus L. ? Brassicaceae		1			1
Reseda lutea L. ? Resedaceae		1			1
Rhinanthus angustifolius C.C. Gmelin ? ? ? ? Orobanchaceae		1			1
Rhinanthus minor L. ? Orobanchaceae		1			1
Ribes × pallidum Otto & F. Dietr. ? Grossulariaceae		1			1
Roripa austriaca (Crantz) Besser a Brassicaceae x (1)				1	1
Rorippa barbareifolia (DC.) Kitag. ? ? Brassicaceae		1			1
Rorippa palustris subsp. palustris (L.) Besser ? ? Brassicaceae		1			1
Rorippa sylvestris subsp. sylvestris (L.) Besser ? ? Brassicaceae		1			1
Rubus idaeus L. subsp. idaeus ? Rosaceae		1			1
Rumex aquaticus L. ? ? ? ? ? ? Polygonaceae		1			1
Rumex confertus Willd. × ? Polygonaceae		1			1
Rumex conglomeratus Murr. p Polygonaceae x x				1	1
Rumex longifolius DC. ? ? ? × ? ? ? ? ? ? Polygonaceae		1			1
Rumex maritimus L. ? × Polygonaceae		1			1
Rumex obtusifolius L. subsp. obtusifolius ? Polygonaceae		1			1
Rumex pseudonatronatus (Borb.) Borb. ex Murb. ? ? Polygonaceae		1			1
Rumex thyrsiflorus Fingerh. ? Polygonaceae		1			1
Rumex ucranicus Fisch. ? Polygonaceae		1			1
Salix myrsinifolia subsp. borealis (Flod.) A.K. Skvortsov ? Salicaceae		1			1
Salsola kali			1		1
Sanguisorba alpina Bunge ? Rosaceae		1			1
Sanguisorba officinalis L. ? Rosaceae		1			1
Saussurea alpina (L.) DC. ? Asteraceae		1			1
Saxifraga umbrosa L. ? Saxifragaceae		1			1
Schedonorus pratensis (Huds.) P. Beauv. × ? ? × ? ? ? Poaceae		1			1
Scleranthus annuus L. ? Caryophyllaceae		1			1
Scorzoneroides autumnalis Moench ? ? × ? ? ? Asteraceae		1			1
Secale cereale L. ? ? ? ? Poaceae		1			1
Senecio dubitabilis C. Jeffrey & Y.L. Chen ? Asteraceae		1			1
Senecio jacobaea L. p Asteraceae x				1	1
Senecio madagascariensis			1		1
Senecio pseudoarnica Less. ? Asteraceae		1			1
Senecio rupestris			1		1
Senecio sylvaticus			1		1
Senecio vernalis Waldst. & Kit. ? Asteraceae		1			1
Senecio viscosus L. ? Asteraceae		1			1
Setaria viridis (L.) P. Beauv. ? Poaceae		1			1
Silene dioica subsp. dioica (L.) Clairv. ? Caryophyllaceae		1			1
Silene flos-cuculi (L.) Greuter & Burdet ? ? Caryophyllaceae		1			1
Silene gallica			1		1
Silene latifolia subsp. alba (Miller) Greuter & Burdet ? ? ? ? ? ? Caryophyllaceae		1			1
Silene noctiflora L. ? ? Caryophyllaceae		1			1
Silene vulgaris (Moench) Garcke subsp. vulgaris ? × ? × ? ? ? Caryophyllaceae		1			1
Silybum marianum			1		1
Sisymbrium irio			1		1
Sisymbrium loeselii L. ? ? ? Brassicaceae		1			1
Sisymbrium orientale			1		1
Sisymbrium polymorphum (Murray) Roth ? Brassicaceae		1			1
Sisymbrium volgense M. Bieb. ex E. Fourn. ? Brassicaceae		1			1
Solanum lycopersicum L. ? Solanaceae		1			1
Solanum nigrum L. ? Solanaceae		1			1
Solanum tuberosum L. ? Solanaceae		1			1
Sonchus arvensis L. ? × × ? Asteraceae		1			1
Spergula arvensis L. ? ? Caryophyllaceae		1			1
Sphallerocarpus gracilis (Besser ex Trevir.) Koso-Pol. × ? Apiaceae		1			1
Stachys palustris L. ? Lamiaceae		1			1
Stellaria alsine Grimm p Caryophyllaceae xx x (2)				1	1
Stellaria graminea			1		1
Stellaria pallida			1		1
Symphytum asperum Lepechin × ? Boraginaceae		1			1
Symphytum officinale			1		1
Tagetes minuta			1		1
Tanacetum parthenium			1		1
Taraxacum erythrospermum group p Asteraceae x xx				1	1
Taraxacum ruderalia agg. ? ? × ? ? ? ? ? ? Asteraceae		1			1
Tetramolopium humile			1		1
Thlaspi arvense L. ? ? × ? ? ? × ? ? ? ? Brassicaceae		1			1
Tragopogon orientalis L. ? Asteraceae		1			1
Tragopogon porrifolius			1		1
Trifolium lupinaster L. × ? Fabaceae		1			1
Trifolium pratense L. ? × ? ? × ? ? ? ? Fabaceae		1			1
Trifolium spadiceum L. ? ? Fabaceae		1			1
Trifolium variegatum Torr. & A. Gray ? Fabaceae		1			1
Tripleurospermum inodorum (L.) Sch.-Bip ? × ? ? × ? ? ? ? ? ? Asteraceae		1			1
Tripleurospermum tetragonospermum (F. Schmidt) Pobed. ? ? Asteraceae		1			1
Trisetum spicatum (L.) Rich. p Poaceae x (2)				1	1
Tussilago farfara L. ? Asteraceae		1			1
Ulex minor Roth. p Fabaceae x				1	1
Urtica cannabina L. ? Urticaceae		1			1
Vaccaria hispanica (Mill.) Rauschert ? Caryophyllaceae		1			1
Vaccinium vitis-idaea L. p Ericaceae x				1	1
Valeriana officinalis L. ? Caprifoliaceae		1			1
Verbascum pulverulentum			1		1
Verbascum thapsus			1		1
Verbascum virgatum			1		1
Verbesina encelioides			1		1
Veronica anagallis-aquatica			1		1
Veronica arvensis			1		1
Veronica gentianoides Vahl ? Plantaginaceae		1			1
Veronica longifolia L. ? Plantaginaceae		1			1
Veronica officinalis L. ? ? Plantaginaceae		1			1
Veronica peregrina			1		1
Veronica persica			1		1
Vicia angustifolia L. ? Fabaceae		1			1
Vicia cracca L. IT IT × Fabaceae		1			1
Vicia hirsuta (L.) Gray ? ? Fabaceae		1			1
Vicia sepium L. ? × Fabaceae		1			1
Vicia tenuifolia Roth ? Fabaceae		1			1
Vicia tetrasperma (L.) Schreb. ? Fabaceae		1			1
Vulpia myuros			1		1
Wahlenbergia gracilis			1		1
Xanthium spinosum			1		1
